# Supplementary material for: First-in-Human Phase I Study of ABBV-085, an Antibody–Drug Conjugate Targeting LRRC15, in Sarcomas and Other Advanced Solid Tumors
Source: Oxford University Press journal article supplement (doi:10.1158/1078-0432.ccr-20-4513), 2021-04-05

**Supplementary Figure S3. T-cell infiltration in patients with breast cancer. A)** Staining for HLA-DR, CD3, CD68, PD-L1, and DAPI in samples taken before and after ABBV-085 treatment. **B)** Absolute numbers of CD3+ and CD8+ T cells in pre- and posttreatment samples from four individual patients. PD-L1, programmed cell death protein 1 ligand 1.

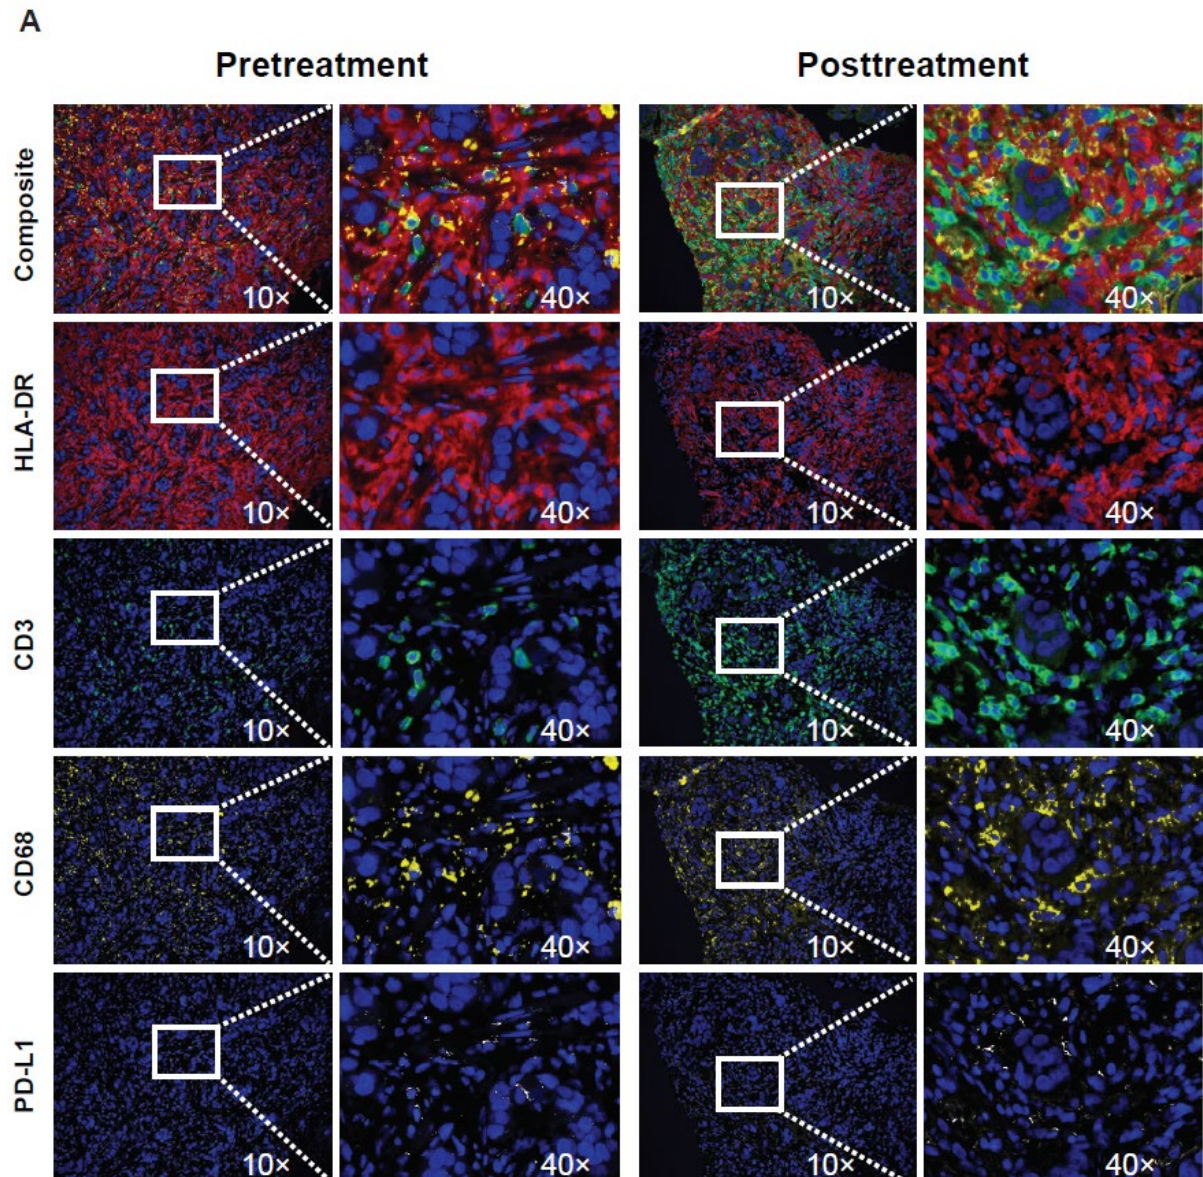

**B**

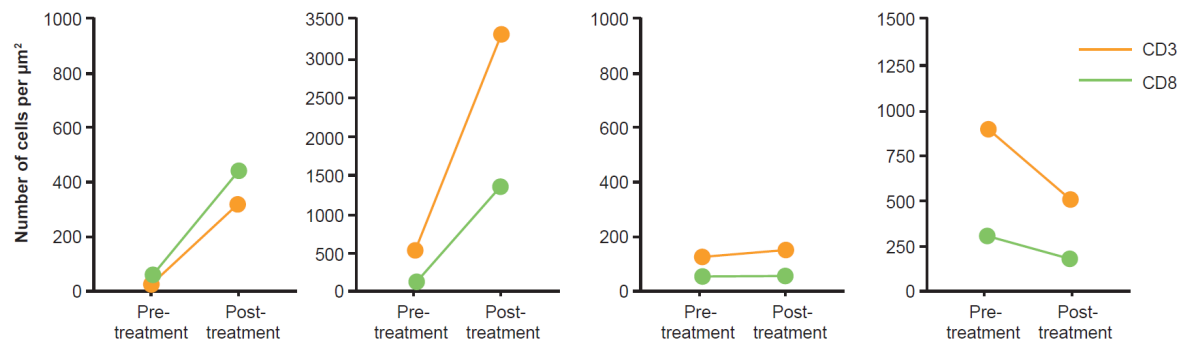

Supplement: 10780432ccr204513-sup-255793_2_supp_6966372_qpd7xc.pdf [file 10780432ccr204513-sup-255793_2_supp_6966372_qpd7xc.pdf]
